# Supplementary material for: Efficacy classification of modern therapies in multiple sclerosis
Source: Atypon-hosted journal article supplement (doi:10.2217/cer-2020-0267), 2021-02-23
Supplement: supplementary materials.docx [file supplementary%20materials.docx]

**Supplementary Materials**

Supplementary materials to accompany *Efficacy classification of modern therapies in multiple sclerosis*

**Appendix A Baseline Risk Adjusted NMA Results**

###### Baseline Risk Adjusted NMA Results


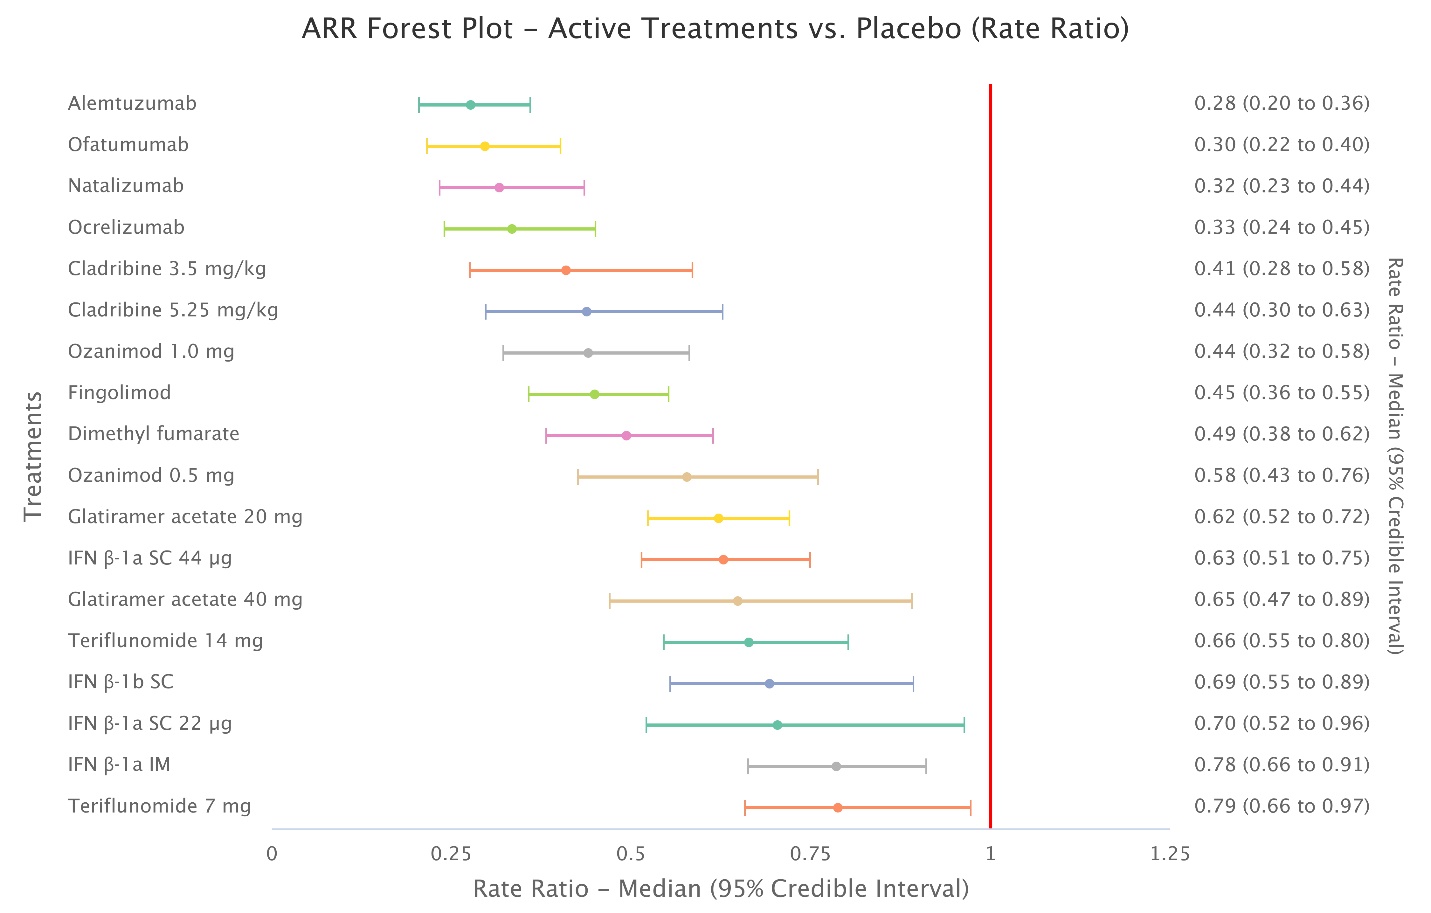
**Figure S1. Forest plot of DMT versus placebo effect estimates for the baseline risk adjusted ARR NMA.**ARR: annualised relapse rate; DMT: disease-modifying therapy; IFN: interferon; IM: intramuscular; NMA: network meta‑analysis; SC: subcutaneous.
